# Supplementary material
Source: PubMed Central journal article supplement (PMC5136528)

# Supplemental Figure 1

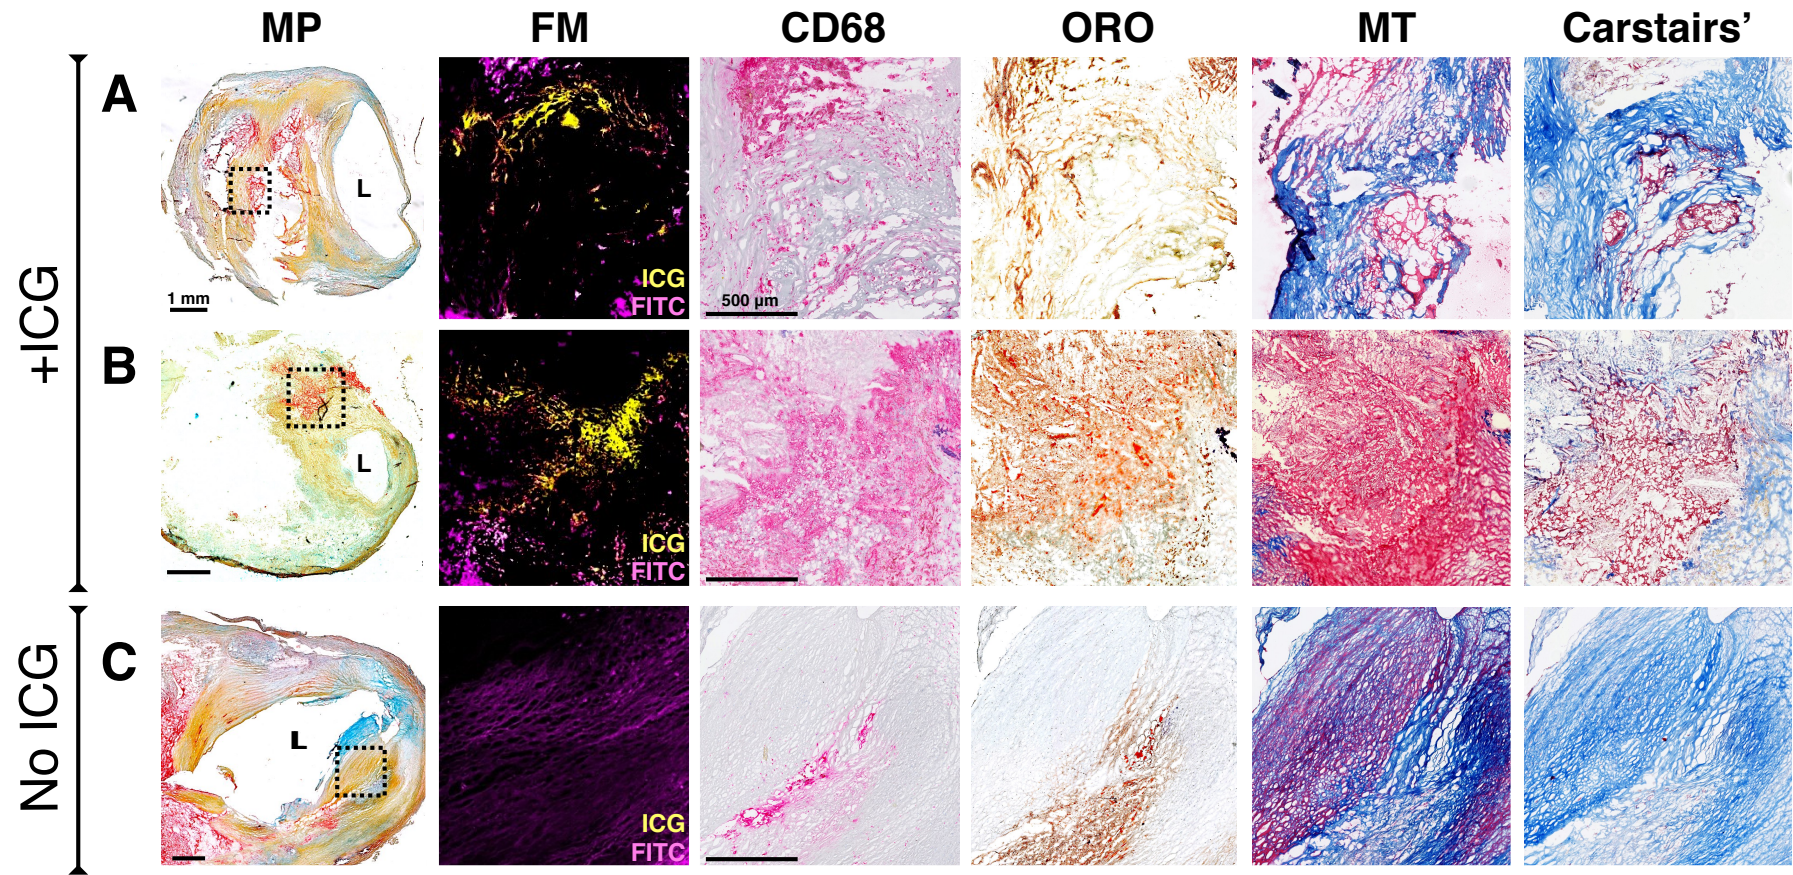

Supplement: NIHMS809977-supplement-2.pdf [file NIHMS809977-supplement-2.pdf]
